# Supplementary material for: Random plasma glucose in early pregnancy is a better predictor of gestational diabetes diagnosis than maternal obesity
Source: Springer Nature journal article supplement (doi:10.1007/s00125-015-3811-5), 2015-11-20
Supplement: MOESM1 [file 8093436]

ESM Table 1: Current & recent criteria used for diagnosis of GDM based on the oral glucose tolerance test (OGTT)

|                                       | IADPSG,<br>WHO 2013<br>and ADA<br>2014<br>(11] | WHO 1999                     | Modified<br>WHO 1999         | NICE 2015                    | American<br>Congress of<br>Obstetrics and<br>Gynaecology<br>(ACOG) |
|---------------------------------------|------------------------------------------------|------------------------------|------------------------------|------------------------------|--------------------------------------------------------------------|
| Diagnostic requirements               | 1 abnormality on 75g OGTT                      | 1 abnormality on 75g OGTT    | 1 abnormality on 75g OGTT    | 1 abnormality on 75g OGTT    | 2 abnormalities on 100g OGTT                                       |
| Fasting plasma glucose mmol/l (mg/dl) | $\geq 5.1$<br>( $\geq 92$ )                    | $\geq 7.1$<br>( $\geq 128$ ) | $\geq 6.1$<br>( $\geq 110$ ) | $\geq 5.6$<br>( $\geq 101$ ) | $> 5.3$<br>( $\geq 95$ )                                           |
| OGTT 1hr glucose mmol/l (mg/dl)       | $\geq 10.0$<br>( $\geq 180$ )                  | -                            | -                            | -                            | $\geq 10.0$<br>( $\geq 180$ )                                      |
| OGTT 2hr glucose mmol/l (mg/dl)       | $\geq 8.5$<br>( $\geq 153$ )                   | $\geq 7.8$<br>( $\geq 140$ ) | $\geq 7.8$<br>( $\geq 140$ ) | $\geq 7.8$<br>( $\geq 140$ ) | $\geq 8.6$<br>( $\geq 154$ )                                       |
| OGTT 3hr glucose mmol/l (mg/dl)       | -                                              | -                            | -                            | -                            | $\geq 7.8$<br>( $\geq 140$ )                                       |
